# Supplementary material for: Total synthesis of [β-HIle]2-nodupetide: effect of ester to amide substitution on its antimicrobial activity
Source: Royal Society of Chemistry journal article supplement (doi:10.1039/d4ra04401k), 2024-01-01
Supplement: d4ra04401k1.pdf [file d4ra04401k1.pdf]

## Supporting Information

### Total Synthesis of $[\beta\text{-Hlle}]^2$ -nodupetide: effect of ester to amide substitution on its antimicrobial activity

Harra Ismi Farah,<sup>ac</sup> Unang Supratman,<sup>abc</sup> Ace Tatang Hidayat,<sup>abc</sup> and Rani Maharani <sup>\*abc</sup>

<sup>a.</sup> Department of Chemistry, Faculty of Mathematics and Natural Science, Universitas Padjadjaran, Jatinangor, West Java, Indonesia, E-mail: r.maharani@unpad.ac.id

<sup>b.</sup> Central Laboratory, Universitas Padjadjaran, Jalan Raya Bandung-Sumedang KM 21, Jatinangor 45363, West Java, Indonesia

<sup>c.</sup> Pharmacy Faculty, Universitas Mulawarman, Samarinda 75242, East Kalimantan, Indonesia

#### Table of Contents

|          |                                                                                                                     |   |
|----------|---------------------------------------------------------------------------------------------------------------------|---|
| Figure 1 | Chromatogram of analytical RP-HPLC of linear $[\beta\text{-Hlle}]^2$ -nodupetide <b>9</b> .                         | 2 |
| Figure 2 | Mass spectrum of linear $[\beta\text{-Hlle}]^2$ -nodupetide <b>9</b> .                                              | 2 |
| Figure 3 | <sup>1</sup> H-NMR (500 MHz) spectrum of linear $[\beta\text{-Hlle}]^2$ -nodupetide <b>9</b> in CD <sub>3</sub> OD. | 3 |
| Figure 4 | <sup>13</sup> C-NMR (125 MHz) spectrum of $[\beta\text{-Hlle}]^2$ -nodupetide <b>9</b> in CD <sub>3</sub> OD.       | 3 |
| Figure 5 | Chromatogram of analytical RP-HPLC of $[\beta\text{-hile}]^2$ -nodupetide <b>2</b> .                                | 4 |
| Figure 6 | Mass spectrum of $[\beta\text{-Hlle}]^2$ -nodupetide <b>2</b> .                                                     | 4 |
| Figure 7 | <sup>1</sup> H-NMR (500 MHz) spectrum of $[\beta\text{-Hlle}]^2$ -nodupetide <b>2</b> in CD <sub>3</sub> OD.        | 5 |
| Figure 8 | <sup>13</sup> C-NMR (125 MHz) $[\beta\text{-Hlle}]^2$ -nodupetide <b>2</b> in CD <sub>3</sub> OD.                   | 5 |

[ $\beta$ -Hile]<sup>2</sup>-nodupetide linear **9** (synthesis on solid-phase)

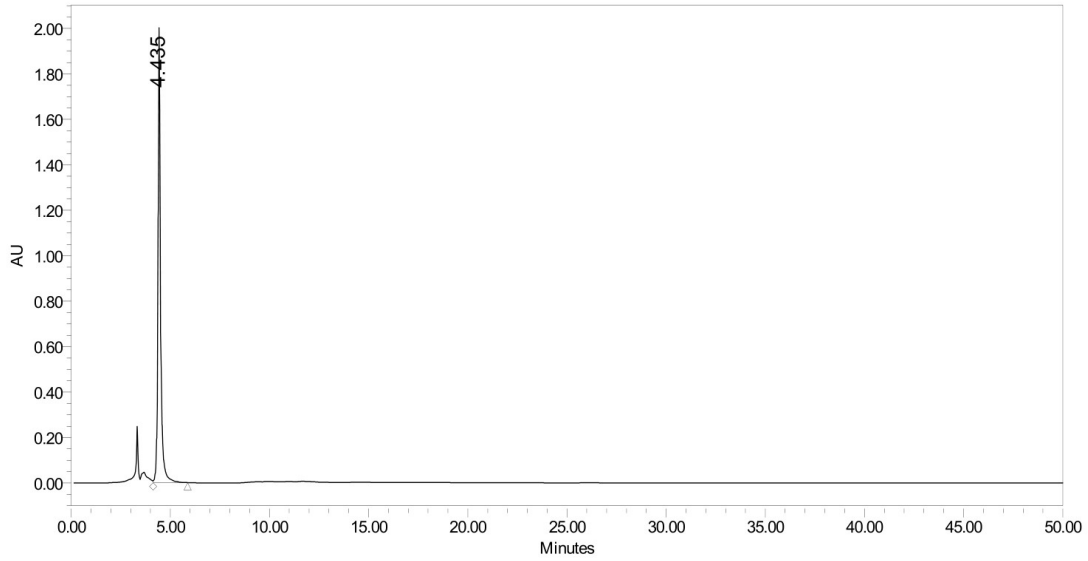

Figure 1 Chromatogram of analytical RP-HPLC of linear [ $\beta$ -Hile]<sup>2</sup>-nodupetide **9**.

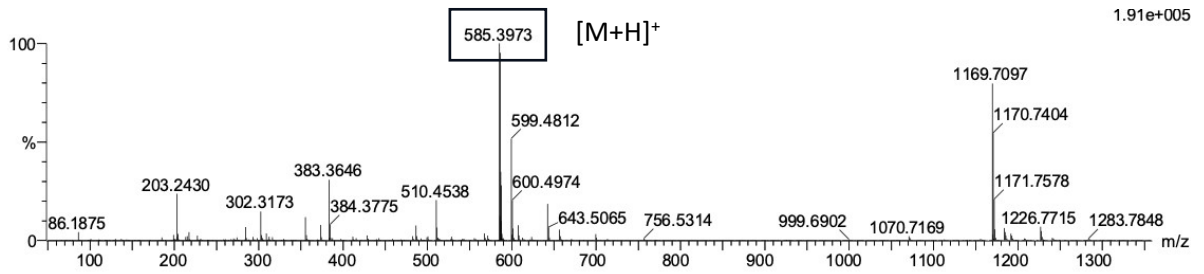

Figure 2 Mass spectrum of linear [ $\beta$ -Hile]<sup>2</sup>-Nodupetide **9**.

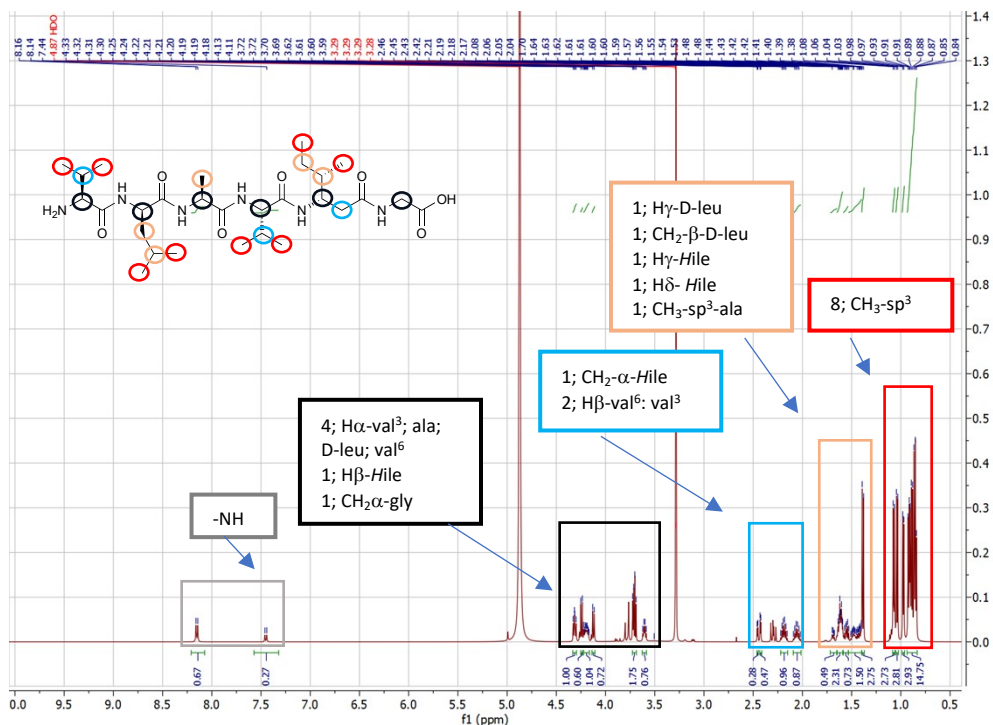

Figure 3  $^1\text{H-NMR}$  (500 MHz) spectrum of linear  $[\beta\text{-Hile}]^2\text{-Nodupetide 9}$  in  $\text{CD}_3\text{OD}$ .

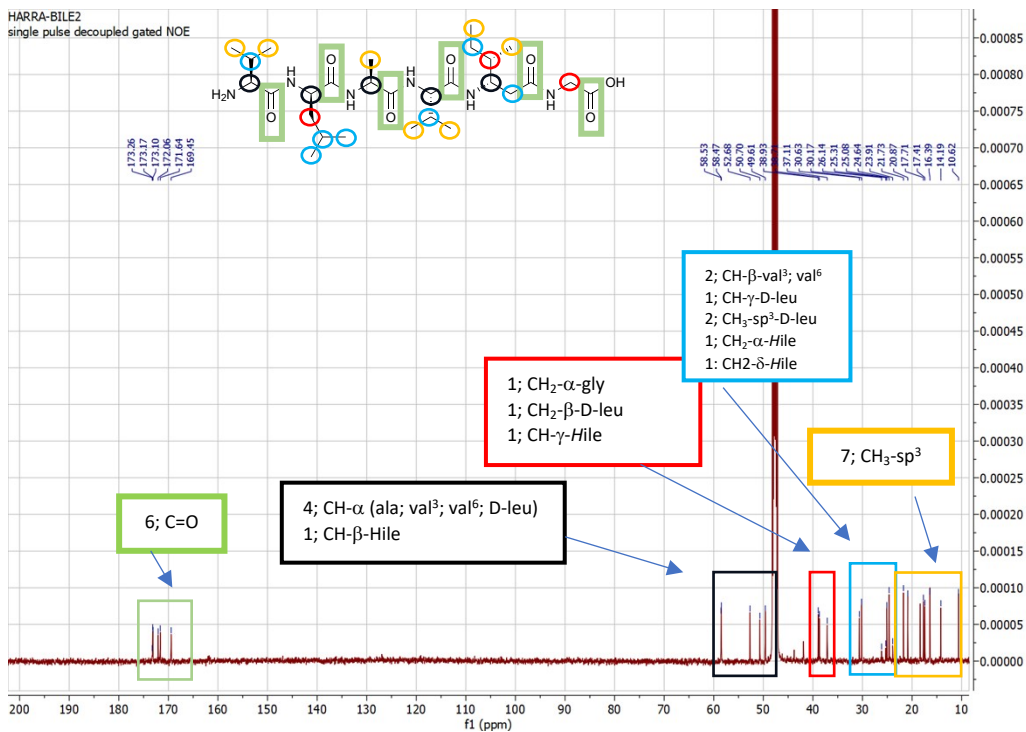

Figure 4  $^{13}\text{C-NMR}$  (125 MHz) spectrum of  $[\beta\text{-Hile}]^2\text{-Nodupetide 9}$  in  $\text{CD}_3\text{OD}$ .

[ $\beta$ -Hlle]<sup>2</sup>-nodupetide 2

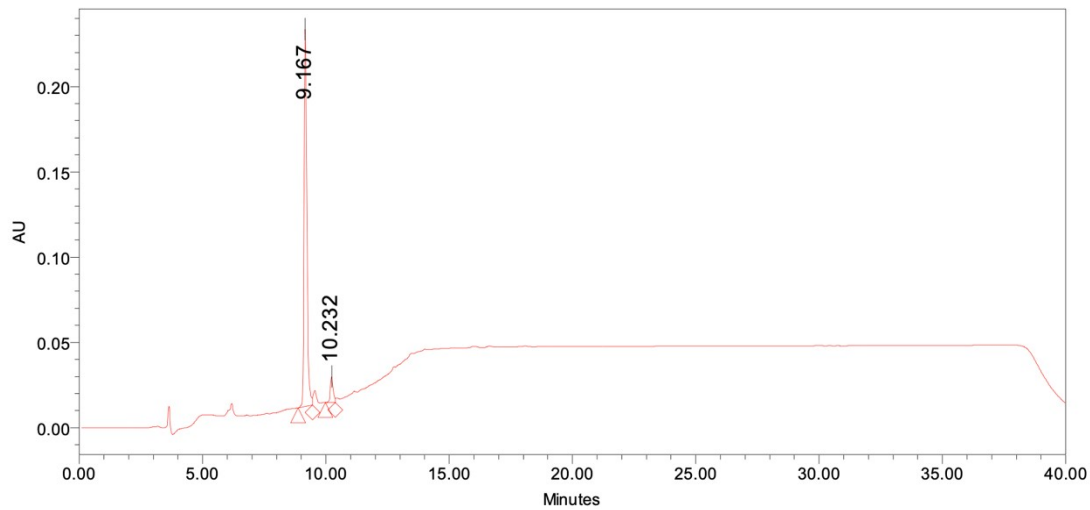

Figure 5 Chromatogram of analytical RP-HPLC of [ $\beta$ -Hlle]<sup>2</sup>-nodupetide 2.

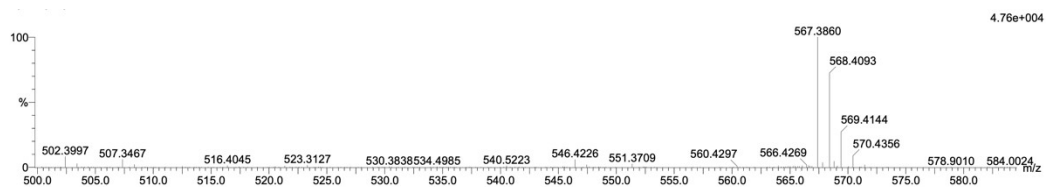

Figure 6 Mass spectrum of [ $\beta$ -Hlle]<sup>2</sup>-nodupetide 2.

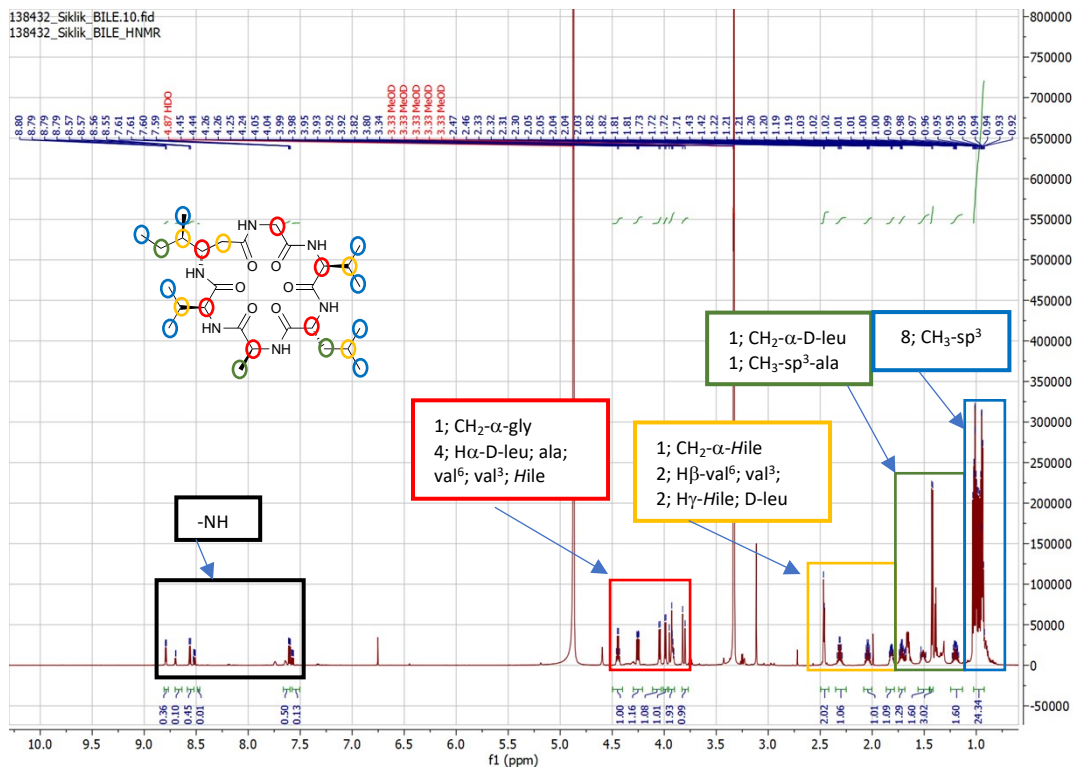

Figure 7  $^1\text{H-NMR}$  (500 MHz) spectrum of  $[\beta\text{-Hile}]_2\text{-nodupetide } 2$  in  $\text{CD}_3\text{OD}$ .

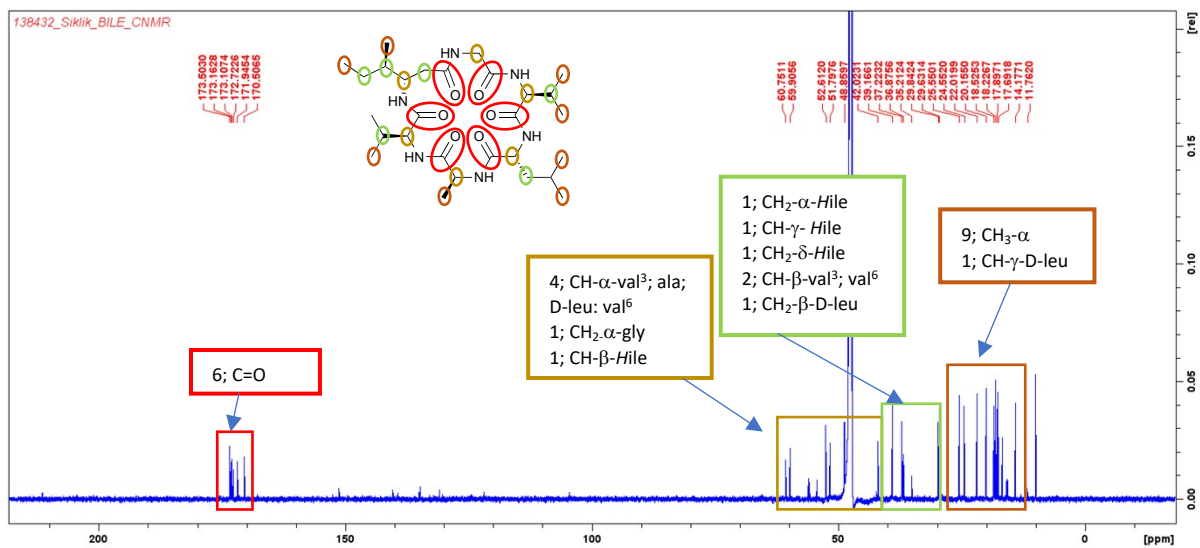

Figure 8  $^{13}\text{C-NMR}$  (125 MHz)  $[\beta\text{-Hile}]_2\text{-nodupetide } 2$  in  $\text{CD}_3\text{OD}$ .
